# Supplementary material
Source: MDPI journal article supplement (https://www.mdpi.com/2306-5710/8/4/78)
Supplement: s1 [file s1]

# Supplementary Materials

Table S1. ANOVA results and estimated regression coefficients for the physical properties of red wine samples treated by pulsed electric fields.

|             |                               | pH        |          |         | Conductivity (mS/cm) |           |         | TA (tartaric acid g/L) |           |         | Color <i>L</i> * |          |         | Color <i>b</i> * |          |         |
|-------------|-------------------------------|-----------|----------|---------|----------------------|-----------|---------|------------------------|-----------|---------|------------------|----------|---------|------------------|----------|---------|
| Terms       |                               | Coeff     | SE Coeff | P value | Coeff                | SE Coeff  | P value | Coeff                  | SE Coeff  | P value | Coeff            | SE Coeff | P value | Coeff            | SE Coeff | P value |
| Linear      | EFS ( <i>X</i> <sub>1</sub> ) | -0.1174   | 0.0111   | 0.000   | 0.08926              | 0.000207  | 0.000   |                        |           |         | -0.0493          | 0.0148   | 0.002   |                  |          |         |
|             | Trt ( <i>X</i> <sub>2</sub> ) | 0.1174    | 00.00316 | 0.000   | 0.00248              | 0.000015  | 0.000   | 0.01353                | 0.000078  | 0.015   |                  |          |         |                  |          |         |
|             | E ( <i>X</i> <sub>3</sub> )   | -0.000888 | 0.00019  | 0.000   | 0.01542              | 0.0000021 | 0.000   |                        |           |         |                  |          |         | -0.002033        | 0.000298 | 0.000   |
| Square      | Trt*Trt                       | -0.000028 | 0.000007 | 0.003   |                      |           |         | -0.00002               | 0.0000001 | 0.045   |                  |          |         |                  |          |         |
| Interaction | E*EFS                         |           |          |         | 0.000001             | 0.000001  | 0.001   |                        |           |         |                  |          |         |                  |          |         |
|             | E*Trt                         | 0.000001  | 0.000001 | 0.003   |                      |           |         |                        |           |         |                  |          |         | 0.00004          | 0.000001 | 0.000   |
|             | EFS*Trt                       |           |          |         |                      |           |         |                        |           |         |                  |          |         |                  |          |         |
|             | EFS*Trt*Trt                   |           |          |         |                      |           |         | 0.000001               |           | 0.004   |                  |          |         |                  |          |         |
| Error       |                               |           |          |         |                      |           |         |                        |           |         |                  |          |         |                  |          |         |
| Lack of fit |                               |           | 0.000    |         |                      | 0.009     |         |                        | 0.752     |         |                  | 0.000    |         |                  | 0.000    |         |
| Adj SS      |                               | 0.087197  |          |         | 0.03268              |           |         | 0.008679               |           |         | 15.48            |          |         | 297.541          |          |         |
| Adj MS      |                               | 0.029066  |          |         | 0.008171             |           |         | 0.002893               |           |         | 15.47            |          |         | 99.180           |          |         |
| Constant    |                               | 2.89      |          |         | 2.25885              |           |         | 1.9785                 |           |         | 14.25            |          |         | 22.267           |          |         |

**Table S2.** ANOVA results and estimated regression coefficients for the total antioxidant capacity (TAC), total phenolic substance content (TPSC), and total monomeric anthocyanin content (TMAC) of the red wine samples treated by pulsed electric fields.

| Terms              | TAC (%)  |          |         | TPSC (g/100 mL) |          |         | TMAC (mg/L) |          |         |
|--------------------|----------|----------|---------|-----------------|----------|---------|-------------|----------|---------|
|                    | Coeff    | SE Coeff | P value | Coeff           | SE Coeff | P value | Coeff       | SE Coeff | P value |
| <b>Linear</b>      |          |          |         |                 |          |         |             |          |         |
| EFS ( $X_1$ )      | 0.01581  | 0.00514  | 0.004   | 2017.6          | 13.1     | 0.003   |             |          |         |
| Trt ( $X_2$ )      | 0.002372 | 0.000326 | 0.000   | 0.6217          | 0.0426   | 0.000   |             |          |         |
| E ( $X_3$ )        |          |          |         |                 |          |         | 0.02469     | 0.00804  | 0.004   |
| <b>Square</b>      |          |          |         |                 |          |         | 0.002216    | 0.000416 | 0.000   |
| Trt*Trt            |          |          |         |                 |          |         |             |          |         |
| EFS*EFS            |          |          |         | 0.2584          | 0.0405   | 0.000   |             |          |         |
| <b>Interaction</b> |          |          |         |                 |          |         |             |          |         |
| E*EFS              |          |          |         |                 |          |         | -0.02213    | 0.00719  | 0.004   |
| EFS*Trt            |          |          |         | -0.01372        | 0.00199  | 0.000   |             |          |         |
| EFS*Trt            |          |          |         |                 |          |         | -0.02213    | 0.00719  | 0.004   |
| <b>Error</b>       |          |          |         |                 |          |         |             |          |         |
| <b>Lack of fit</b> |          | 0.941    |         |                 | 1.101    |         |             | 0.662    |         |
| <b>Adj SS</b>      | 10.515   |          |         | 762871          |          |         | 21.5520     |          |         |
| <b>Adj MS</b>      | 5.2574   |          |         | 190718          |          |         | 3.59200     |          |         |
| <b>Constant</b>    | 72.156   |          |         | 2016.6          |          |         | 36.733      |          |         |

**Table S3.** ANOVA results and estimated regression coefficients for the microbial inactivation of red wine samples treated by pulsed electric fields.

|                    | <i>C. lipolytica</i> |          |         | <i>S. cerevisiae</i> |          |         | <i>H. anemola</i> |          |         | <i>E. coli</i> O157:H7 |          |         | <i>L. delbrueckii ssp. bulgaricus</i> |          |         |
|--------------------|----------------------|----------|---------|----------------------|----------|---------|-------------------|----------|---------|------------------------|----------|---------|---------------------------------------|----------|---------|
| <b>Terms</b>       | Coeff                | SE Coeff | P value | Coeff                | SE Coeff | p value | Coeff             | SE Coeff | p value | Coeff                  | SE Coeff | p value | Coeff                                 | SE Coeff | P value |
| <b>Linear</b>      |                      |          |         |                      |          |         |                   |          |         |                        |          |         |                                       |          |         |
| EFS ( $X_1$ )      | -0.1437              | 0.0413   | 0.001   |                      |          |         |                   |          |         |                        |          |         |                                       |          |         |
| Trt ( $X_2$ )      |                      |          |         |                      |          |         | -0.00637          | 0.00210  | 0.004   |                        |          |         | -0.00275                              | 0.00124  | 0.033   |
| <b>Square</b>      |                      |          |         |                      |          |         |                   |          |         |                        |          |         |                                       |          |         |
| Trt*Trt            | 0.000068             |          | 0.046   | -0.000001            | 0.000007 | 0.024   |                   |          |         | -0.000012              | 0.00004  | 0.008   | 0.000006                              | 0.000002 | 0.024   |
| <b>Interaction</b> |                      |          |         |                      |          |         |                   |          |         |                        |          |         |                                       |          |         |
| EFS*Trt            |                      |          |         |                      |          |         |                   |          |         |                        |          |         |                                       |          |         |
| E*Trt              |                      |          |         | 0.000003             | 0.000001 | 0.012   |                   |          |         |                        |          |         |                                       |          |         |
| <b>Error</b>       |                      |          |         |                      |          |         |                   |          |         |                        |          |         |                                       |          |         |
| <b>Lack of fit</b> |                      | 0.039    |         |                      | 0.093    |         |                   | 0.012    |         |                        | 0.031    |         |                                       |          |         |
| <b>Adj SS</b>      | 2.909                |          |         | 278.99               |          |         | 142.691           |          |         | 183.078                |          |         | 118.022                               |          |         |
| <b>Adj MS</b>      | 2.9086               |          |         | 30.99                |          |         | 15.86             |          |         | 20.3420                |          |         | 13.1136                               |          |         |
| <b>Constant</b>    | 121.156              | 13.4617  | 0.000   | 8.375                |          |         | 7.005             | 0.213    | 0.000   | 6.456                  | 0.214    | 0.000   | 6.151                                 |          |         |
